# Supplementary material for: Web-Based Technology to Improve Disease Knowledge Among Adolescents With Sickle Cell Disease: Pilot Study
Source: PubMed Central journal article supplement (PMC6996770; doi:10.2196/15093), 2020-01-07
Supplement: pediatrics_v3i1e15093_app1.pdf [file pediatrics_v3i1e15093_app1.pdf]

# Phase VI Teaching Comprehensive Review

1. The hemoglobin is measured in a lab test called \_\_\_\_\_  
Complete blood count  
Sickle cell test  
White blood test
2. Sickle cell disease is a blood disorder that affects the \_\_\_\_\_ blood cells.  
Red  
White  
Nerve
3. \_\_\_\_\_ is pneumonia along with one or more of the following symptoms:  
fever; chest pain; coughing; wheezing; or shortness of breath.  
Acute Chest Syndrome  
Stroke  
Osteomyelitis
4. Pain has many different causes; but the most common cause of sickle cell pain is due to  
to  
Sickling of the red blood cells  
Drinking plenty of water  
Exercising
5. \_\_\_\_\_ is damage to the brain due to lack of oxygen supply. Symptoms can include paralysis in part of the body; changes in visions; seizures; and/ or changes in speech  
Stroke  
Avascular necrosis (AVN)  
Osteomyelitis
6. Red blood cells contain \_\_\_\_\_.  
Hemoglobin  
Water  
Nutrients

7. \_\_\_\_\_ is damage to the eye caused by sickle cells blocking the eye vessels. This requires an eye exam every year for patients with Hemoglobin SC disease and every 2 years for all others sickle cell patients.  
Retinopathy  
Gallstones  
Avascular necrosis
8. Name the most common sign of an infection.  
Fever  
Stomach pain  
Nausea  
Runny nose
9. Hemoglobin carries \_\_\_\_\_ throughout the body. Answer  
Oxygen  
Food  
Water
10. \_\_\_\_\_ is an infection in the bone and symptoms include fever; swelling; heat; and/or soreness to the area.  
Osteomyelitis  
Gallstones  
Acute Chest Syndrome
11. \_\_\_\_\_ is caused by loss of blood (oxygen) supply to the bone which can result in painful bone to bone contact  
Avascular necrosis (AVN)  
Stroke  
Retinopathy
12. Management for sickle cell pain at home includes which of the following  
Drinking water  
Applying heat to the area  
Getting rest  
Taking an anti inflammatory such as ibuprofen or naproxen  
All of the above
